# Supplementary material for: Discovery and validation of the prognostic value of the lncRNAs encoding snoRNAs in patients with clear cell renal cell carcinoma
Source: Aging (Albany NY). 2020 Mar 3;12(5):4424–44. doi: 10.18632/aging.102894 (PMC7093172; doi:10.18632/aging.102894)
Supplement: Supplementary Figure 1 [file aging-12-102894-s001..pdf]

## SUPPLEMENTARY FIGURE

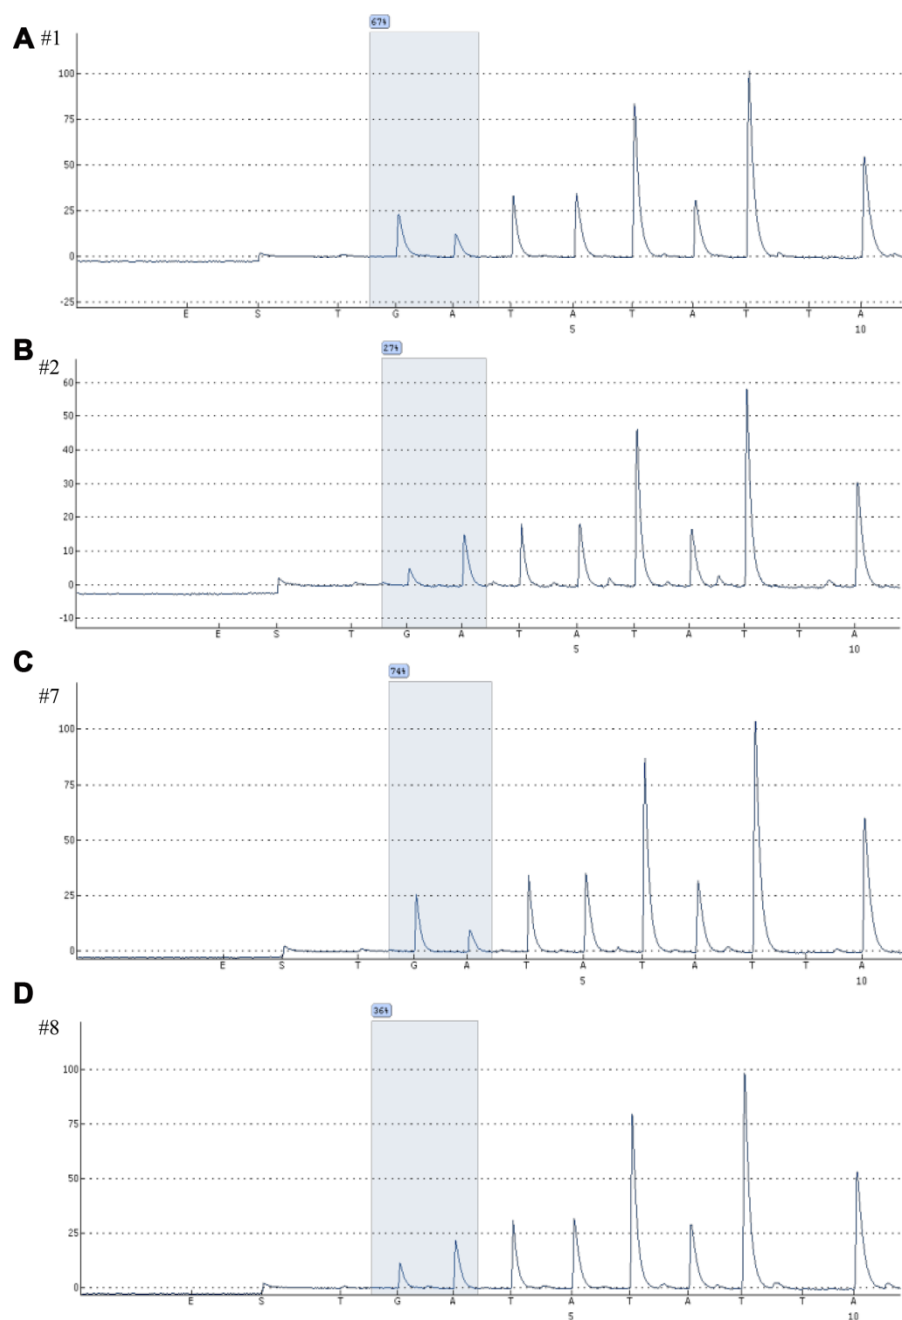

**Supplementary Figure 1. The representative results of pyrosequencing for cg15161854 methylation level in two paired samples.** Increased methylation shown in adjacent normal renal samples no. 1 (A) and no. 7 (C) and low methylation in ccRCC no. 2 (B) and no.8 (D).
