# Supplementary material for: Discovery and validation of the prognostic value of the lncRNAs encoding snoRNAs in patients with clear cell renal cell carcinoma
Source: publisher site journal article supplement (doi:10.18632/aging.102894), 2020-03-03
Supplement: Supplementary file [file aging-v12i5-102894-supplementary-material-SD2.pdf]

## SUPPLEMENTARY TABLE

**Supplemental Table 1. The detailed primer sequences for q-RT-PCR and pyrosequencing.**

| <b>q-RT-PCR</b>       |            |                                |                    |                 |
|-----------------------|------------|--------------------------------|--------------------|-----------------|
| Gene                  | Primer     | Sequence (5'-3')               | Nt                 | Tm              |
| SNHG3                 | Forward    | GACGATCTGCACTTCGCATT           | 20                 | 59              |
|                       | Reverse    | TGCTCCAAGTCTGCCAAAGAT          | 21                 | 59.3            |
| SNHG15                | Forward    | TGGCAGACCTGTACTCCGTA           | 20                 | 59.96           |
|                       | Reverse    | GACTAGACTGCCGAAGACCG           | 20                 | 59.9            |
| GAPDH                 | Forward    | GAAAGCCTGCCGGTACTAA            | 20                 | 60.32           |
|                       | Reverse    | GCATCACCCGGAGGAGAAAT           | 20                 | 59.82           |
| <b>pyrosequencing</b> |            |                                |                    |                 |
| CpG site              | Primer     | Sequence (5'-3')               | Length of amplicon | 5' modification |
| cg07807470            | Forward    | GTAGAGTGGGATTTGAATATTTATTGATAG | 276                | 5'-Biotin       |
|                       | Reverse    | AAAAACAAACATCAAATTCCTACTC      |                    |                 |
|                       | Sequencing | AGATTTATGTAGTTATAGTAGGA        |                    |                 |
| cg15161854            | Forward    | TGGGATTATAGTTGTGAGTTATTTTGT    | 200                | 5'-Biotin       |
|                       | Reverse    | CCTTCAACAATACCATTCAAATTCTTAACT |                    |                 |
|                       | Sequencing | AACCACAAACATACAATC             |                    |                 |
| cg00953154            | Forward    | TAGGTTTGTAGTTTTAGGAAGGTAGAGT   | 83                 | 5'-Biotin       |
|                       | Reverse    | ACTATCACAACAACCTCCTTTACA       |                    |                 |
|                       | Sequencing | GGTAGAGTTGGGGTT                |                    |                 |
| cg16459265            | Forward    | TTGGGTGAATGAGGGTAGT            | 197                | 5'-Biotin       |
|                       | Reverse    | ACACCAATCTATACAAAACCCAAAACAC   |                    |                 |
|                       | Sequencing | GGTGAATGAGGGTAGTA              |                    |                 |
